# Supplementary material
Source: PubMed Central journal article supplement (PMC4439098)
Supplement: NIHMS689823-supplement-1.pdf [file NIHMS689823-supplement-1.pdf]

## Nature Methods

# Molecular evolution approaches to design advanced red fluorescent proteins

Fedor V Subach, Kiryl D Piatkevich & Vladislav V Verkhusha

**Supplementary Figure 1.** Alignment of amino acid sequences of derivatives of RFPs with different phenotype.

**Supplementary Table 1.** Overview of suboptimal properties of current monomeric red fluorescent proteins.

**Supplementary Table 2.** Current red fluorescent proteins exhibiting the best specific property or maximally optimized for the specific imaging application.

**Supplementary Table 3.** Properties of the major chromophore structures observed in fluorescent proteins.

**Supplementary Table 4.** Amino acid residues in the supporting positions responsible for different phenotypes and properties of red fluorescent proteins.

**Supplementary Note**

**Supplementary Figure 1.** Alignment of amino acid sequences of derivatives of RFPs with different phenotype.

(A) TagBFP-like phenotype, (B) Fluorescent timer-like phenotype, (C) Photoactivatable-like phenotype, (D) Photoswitchable-like phenotype, (E) Far-red-shifted-like phenotype, (F) Large Stokes shift-like phenotype; and properties: (G) High quantum yield, (H) High photostability, (I) High pH-stability, (J) Fast maturation, (K) Monomeric state. Residues in key positions are selected with red, green, or blue colors to denote which of them are responsible for the respective phenotype independently, in concerted manner, or either of these two ways, respectively. Amino acid residues in the supporting positions are highlighted with yellow color.

**(A) TagBFP-like phenotype**

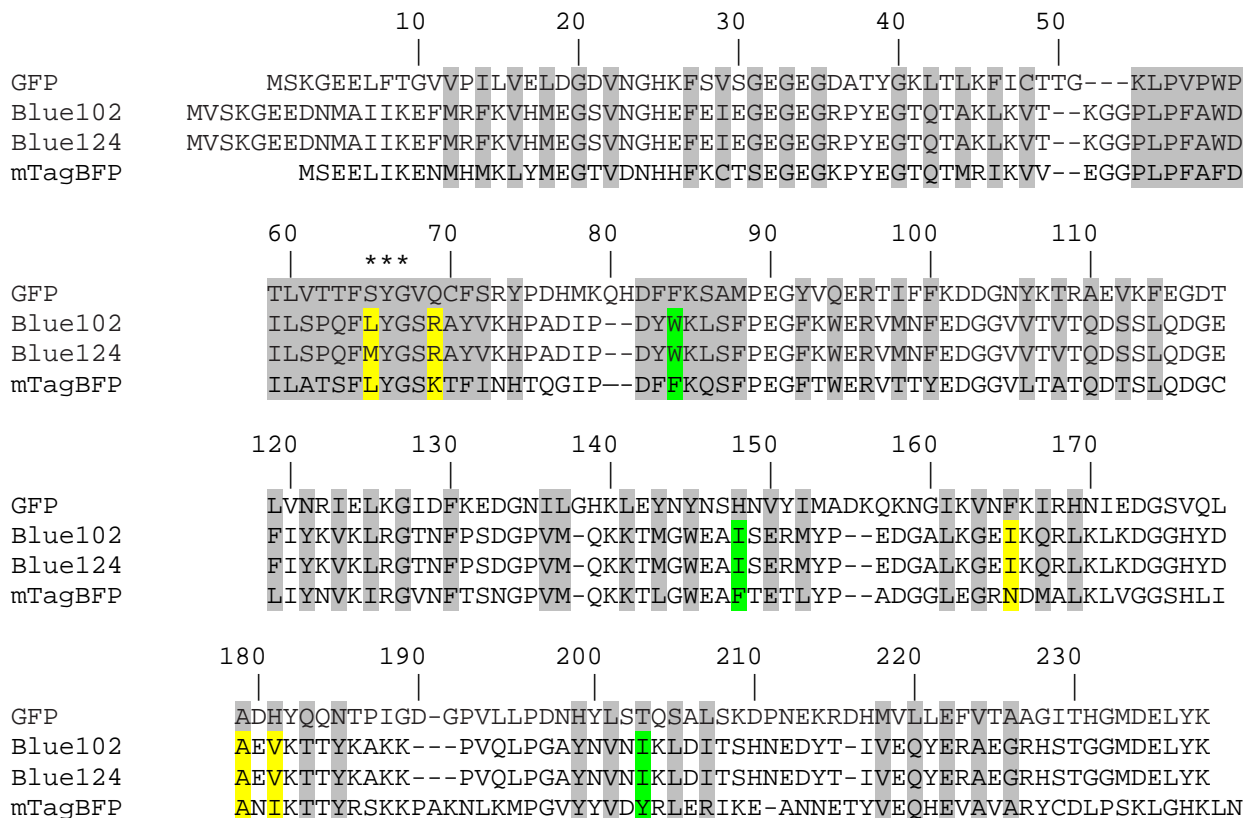

**(B) Fluorescent timer-like phenotype**

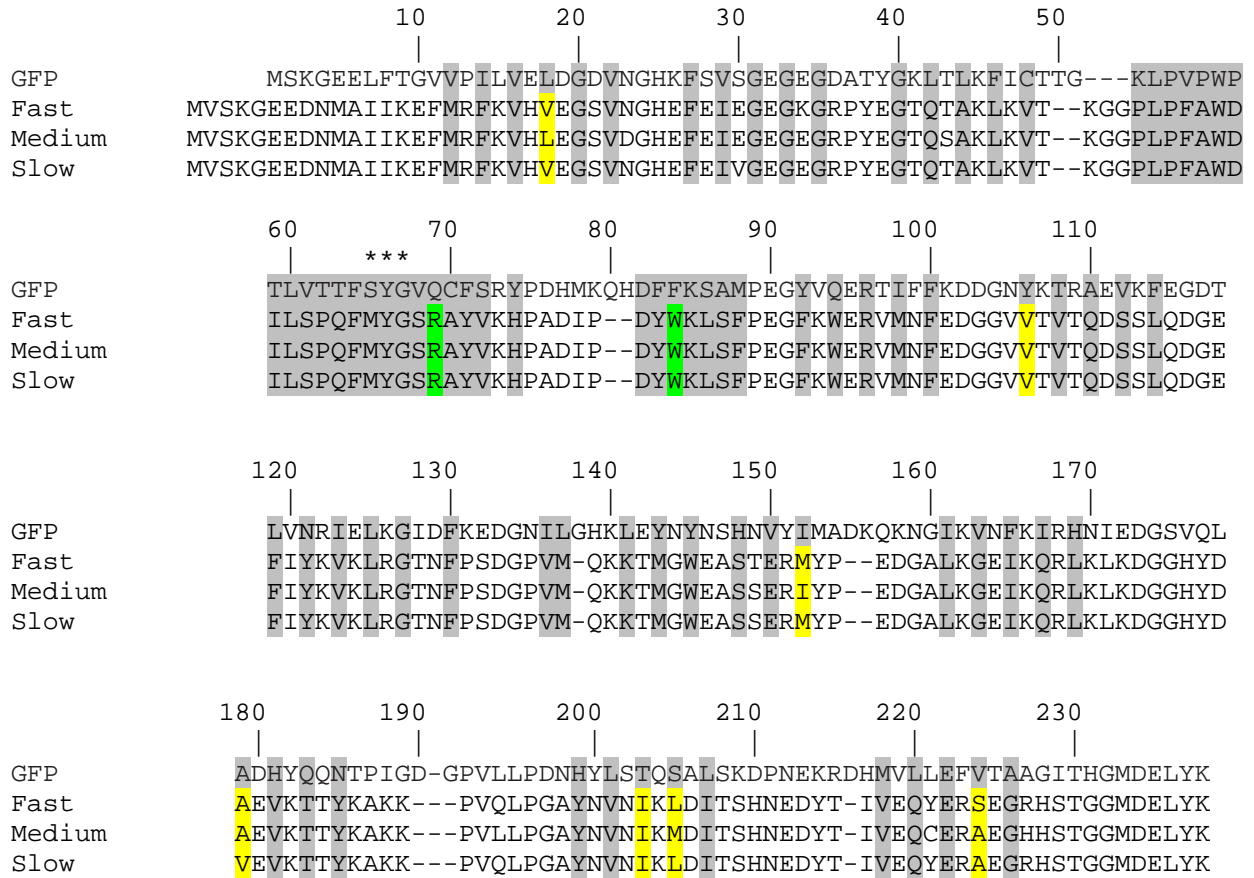

### (C) Photoactivatable-like phenotype

```

          10      20      30      40      50
          |      |      |      |      |
GFP      MSKGEELFTGVVPIILVELDGDVNGHKFSVSGEGEGDATYGKLTTLKFICTTG---KLPVPWP
PAmCherry1 MVSKEEDNMAIIKEFMRFKVHMEGTVNGHVFEIEGEGEGRPYEGTQTAKLKVT--KGGPLPFTWD
PAmCherry2 MVSKEEDNMAIIKEFMRFKVHLEGSVNGHEFEIEGEGEGRPYEGTQTAKLKVT--KGGPLPFAWD
PAmCherry3 MVSKEEDNMAIIKEFMRFKVHLEGSVNGHEFEIEGEGEGRPYEGTQTAKLKVT--KGGPLPFTWD
PATagRFP      MSELIKENMHMKLYMEGTVNNHHFKCTSEGEGKPYEGTQTMRIKVV--EGGPLPFAFD
PAmKate      MSELIKENMHMKLYMEGTVNNHHFKCTSEGEGKPYEGTQTMRIKVV--EGGPLPFAFD

          60      70      80      90      100     110
          |      |      |      |      |      |
GFP      TLVTTFSYGVQCFSRYPDHMKQHDFFKSAMPEGYVQERTIFFKDDGNYKTRAEVKFEGDT
PAmCherry1 ILSPQFMYGSNAYVKHPADIP--DYFKLSFPEGFKWERVMKFEDGGVVTVTQDSSLQDGE
PAmCherry2 ILSPQFMYGSNAYVKHPADIP--DYFKLSFPEGFKWERVMNFEDGGVVTVTQDSSLQDGE
PAmCherry3 ILSPQFMYGSNAYVKHPADIP--DYFKLSFPEGFKWERVMNFEDGGVVTVTQDSSLQDGE
PATagRFP      ILATSFMYGSTFINHTQGIP--DFWKQSFPEGFTWERVTTYEDGGVLTATQDTSLQDGC
PAmKate      ILATSFMYGSKTFINHTQGIP--DFWKQSFPEGFTWERVTTYEDGGVLTATQDTSLQDGC

          120     130     140     150     160     170
          |      |      |      |      |      |
GFP      LVNRIELKGIDFKEDGNILGHKLEYNYNSHNVYIMADKQKNGIKVNFKIRHNIEDGSVQL
PAmCherry1 FIYKVKLRGTNFPDGPVM-QKKTMGWEALSERMYP--EDGALKGEVVKPRVKKLDGGHYD
PAmCherry2 FIYKVKLRGTNFPDGPVM-QKKTMGWETLSERMYP--EDGALKGELKARTKLDGGHYD
PAmCherry3 FIYKVKLRGTNFPDGPVI-QKKTMGWDALSERMYP--EDGALKGELKARLKLKLDGGHYE
PATagRFP      LIYNVKIRGVNFPDGPVM-KKKTLGWEPSTEKLKP--ADGGLEGRVDMALKLVGGGHLI
PAmKate      LIYNVKIRGVNFPDGPVM-QKKTLGWEANTEMLYP--ADGGLEGRGDMALKLVGGGHLI

          180     190     200     210     220     230
          |      |      |      |      |      |
GFP      ADHYQONTPIGD-GPVLLPDNHYLSTQSALSKDPNEKRDHMLLEFVTAAGITHGMDELYK
PAmCherry1 AEVKTTYKAKK---PVQLPGAYNVNRKLDITSHNEDYT-IVEQYERAEGRHSTGGMDELYK
PAmCherry2 TEVKTTYKAKK---PVQLPGAYNVNRKLDITSHNEDYT-IVEQYERAEGRLHSTGGMDELYK
PAmCherry3 AEVKTTYKAKK---PVQLPGAYNVNRKLDITSHNEDYT-IVEQYERAEGRHSTGGMDELYK
PATagRFP      CNFKTTYRSKKPAKNLKMFGVYVDRRLERIKEADKET-YWEQHEVAVARYSDLPSKLGHLN
PAmKate      CNLKTTYRSKKPAKNLKMFGVYVDRRLERIKEADKET-YVEQHEVAVARYCDLPSKLGHLN
```

(D) Photoswitchable-like phenotype

```

          10      20      30      40      50
          |      |      |      |      |
GFP      MSKGEELFTGVVPI LVELDGDVNGHKFSVSGEGEGDATYGKLT LKFICTTG---KLPVPWP
rsCherryRev  MVSKGEEDNMAIIKEFMRFKVHMEG SVNGHEFEIEEGEGEGRPYEGTQTAKLKVT--KGGPLPFAWD
rsCherry    MVSKGEEDNMAIIKEFMRFKVHMEG SVNGHEFEIEEGEGEGRPYEGTQTAKLKVT--KGGPLPFAWD
rsTagRFP    MVSKGEELIKENMHMKLYMEGT VNNHHFKCTSEGEGKPYEGTQTMRIKVV--EGGPLPFAFD
KFPl      MASLLTETMPFKTTIEGTVNGHCFKCIGKGEGNPFEGTQEMKIEVI--EGGPLPFAFH
IrisFP     HHMSAIKPD MKINLRMEGNVNGHHFVIDGDGTGKPFEGKQSM DLEVK--EGGPLPFAFD

          60      70      80      90      100     110
          |      |      |      |      |      |
GFP      TLVTTFSYGVQCFSRYPDHMKQHDFFKSAMPEGYVQERTIFFKDDGNYKTRAEVKFEGDT
rsCherryRev  ILSPQFMYGSKAYVKHPADIP--DYLKLSFPEGFKWERVMNFEDGGVVTVTQDSSLQDGE
rsCherry    ILSPQFMYGSKAYVKHPADIP--DYLKLSFPEGFKWERVMNFEDGGVVTVTQDSSLQDGE
rsTagRFP    ILATSFMYGSRTFINHTQGIP--DFWKQSFPEGFTWERVTTYEDGGVLTATQDTSLQDGC
KFPl      ILSTSCMYGSKTFIKYVSGIP--DYFKQSFPEGFTWERTTTYEDGGFLT AHQDTSLDGDC
IrisFP     ILTTAFHYGNRVFAEYPDHIQ--DYFKQSFPGKYSWERSLTFEDGGIC IARNDITMEGDT

          120     130     140     150     160     170
          |      |      |      |      |      |
GFP      LVNRIELKGIDFKEDGNILGHKLEYNYN SHNVYIMADKQKNGIKVNFKIRHNI EDGSVQL
rsCherryRev  FIYKVKLRG TNFPSDGPVM-QKKTMGWVACSERMYP--EDGALKGESK MRLKLDGGHYD
rsCherry    FIYKVKLRG TNFPSDGPVM-QKKTMGWVASSERMYP--EDGALKGESK QRLKLDGGHYD
rsTagRFP    LIYNVKLRG VNFPSNGPVM-QKKT LGWEAATEMLYP--ADGGLEGRGDMALKLVGGGHLI
KFPl      LVYKVKILGN NFPADGPVM-QNKVGRWEPGTEIVYE--VDGVLRGQSLMALKCPGGRHLT
IrisFP     FYNKVRFHG VNF PANGPVM-QKKT LKWEPESTEKMYV--RDGVLTGDI TMALLLEGNAHYR

          180     190     200     210     220     230
          |      |      |      |      |      |
GFP      ADHYQQNTPIGD-GPVLLPDNHYLSTQSALS KDPNEKRDHMLLEFVTAAGITHGMDELYK
rsCherryRev  AEFKTTYKAKK---PVQLPGAYNVN IKLDITSHNEDYT-IVEQYERAEGRHSTGGMDELYK
rsCherry    AEFWTTYKAKK---PVQLPGAYNVN IKLDITSHNEDYT-IVEQYERAEGRHSTGGMDELYK
rsTagRFP    CNLKT TYRSKNPAK NLKMPGVYFVDHRLERIKEADKET-YVEQHEVAVARYCDLPSKLGHKL N
KFPl      CHLHT TYRSK KPASAL KMPGFHFEDHRIEIMEEVEK GK-CYKQYEA AVGRYCD AAPS KLGHN
IrisFP     CDSRT TYKAKE--KGVKLPGYHLVDHCIEILSHDKDYN-KVKLYEHAVAH SGLPDNARR
```

### (E) Far-red-shifted-like phenotype

```

          10      20      30      40      50
GFP      MSKGEELFTGVVPIILVELDGDVNGHKFSVSGEGEGDATYGKLTTLKFICTTG---KLPVPWP
mNeptune MSELIKENMHMKLYMEGTVNNHHFKCTSEGEGKPYEGTQTGRIKVV--EGGPLPFAFD
TagRFP657 MSELITENMHMKLYMEGTVNNHHFKCTSEGEGKPYEGTQTORIKVV--EGGPLPFAFD
E2-Crimson MDSTENVIKPFMRFKVHMEGSVNGHEFEIEGVGEGKPYEGTQTAKLQVT--KGGPLPFAWD
eqFP650   MGEDSELISENMHMKLYMEGTVNGHHFKCTSEGEGKPYEGTQTAKIKVV--EGGPLPFAFD
eqFP670   MGEDSELISENMHTKLYMEGTVNGHHFKCTSEGEGKPYEGTQTCKIKVV--EGGPLPFAFD
mPlum     MVSKGEENMAIIKEFMRFKEHMEGSVNGHEFEIEEGEGGRPYEGTQTARLKVT--KGGPLPFAWD
mRouge    MVSKGEEDNMAIIKEFMRFKTHMEGSVNGHEFEIEEGEGGRPYEGTQTAKLKVT--KGGPLPFAWD
RFP639    MNSLIKENMRMMVMMEGSVNGYQFKCTGEGDGNPYMGTQTRIKVV--EGGPLPFAFD

          60      70      80      90      100     110
GFP      TLVTTFSYGVQCFSRYPDHMKQHDFFKSAMPEGYVQERTIFFKDDGNYKTRAEVKFEGDT
mNeptune ILATCFMYGSKTFINHTQGIP--DFFKQSFPEGFTWERVTTYEDGGVLTATQDTSLQDGC
TagRFP657 ILATSFMYGSHTFINHTQGIP--DFWKQSFPEGFTWERVTTYEDGGVLTATQDTSLQDGC
E2-Crimson ILSPQFFYGSKAYIKHPADIP--DYLKQSFPEGFKWERVMNFEDGGVVTVTQDSSLQDGT
eqFP650   ILATSFMYGSKTFINHTQGIP--DFFKQSFPEGFTWERITTYEDGGVLTATQDTSLQNGC
eqFP670   ILATSFMYGSKTFINHTQGIP--DFFKQSFPEGFTWERITTYEDGGVLTATQDTSLQNGC
mPlum     ILSPQIQYGSKAYVKHPADIP--DYLKLSFPEGFKWERVMNFEDGGVVTVTQDSSLQDGE
mRouge    ILSPQFMYGSKAYVKHPADIP--DYLKLSFPEGFKWERVMNFEDGGVVTVTQDSSLQDGE
RFP639    ILATSFMYGSKTFIKHTKGIP--DFFKQSFPEGFTWERVTRYEDGGVFTVMQDTSLQEDGC

          120     130     140     150     160     170
GFP      LVNRIELKGIDFKEDGNILGHKLEYNYNSHNVYIMADKQKNGIKVNFKIRHNIEDGSVQL
mNeptune LIYNVKIRGVNFPSNGPVM-QKKTLGWEASTETLYP--ADGGLEGRCDMALKLVGGGHLI
TagRFP657 LIYNVKIRGVNFPSNGPVM-QKKTLGWEAHTETLYP--ADGGLEGRTALAKLVGGGHLI
E2-Crimson LIYHVKFIGVNFPSDGPVM-QKKTLGWEPSTERNYP--RDGVLKGENHMALKLVGGGHYL
eqFP650   LIYNVKINGVNFPSNGPVM-QKKTLGWEASTETLYP--ADSGLRGHSQMALKLVGGGYLH
eqFP670   LIYNVKINGVNFPSNGPVM-QKKTLGWEANTETLYP--ADSGLRGHNQMALKLVGGGYLH
mPlum     FIYKVKVRGTNFPSDGPVM-QKKTMGWEASTERMYP--EDGALKGEMKMRLRLKLDGGGHYD
mRouge    FIYKVKLRGTNFPSDGPVM-QKKTMGWEACSERMYP--EDGALKGEMKMRLRLKLDGGGHYD
RFP639    LVYHAKVTGVNFPSNGAVM-QKKTKGWEPSTETLYP--ADGGLRGYCQMALNVDGGGYLF

          180     190     200     210     220     230
GFP      ADHYQQNTPIGD-GPVLLPDNHYLSTQSALSKDPNEKRDHMVLLEFVTAAGITHGMDELYK
mNeptune CNLKTTYRSKKPAKNLKMPGVYFVDRRLERIKEADKET-YVEQHEVAVARYCDLPSKLGHKLN
TagRFP657 CNFKTTYRSKKPAKNLKMPGVYYVDYRLERIKEADKET-YVEQHEVAVARYCDLPSKLGHKLN
E2-Crimson CEFKSIYMAKPP---VKLPGYHYVDYKLDITSHNEDYT-VVEQYERAEARHHLFQ
eqFP650   CSLKTTYRSKKPAKNLKMPGFYFVDRKLERIKEADKET-YVEQHEMAVARYCDLPSKLGHS
eqFP670   CSLKTTYRSKKPAKNLKMPGFYFVDRKLERIKEADKET-YVEQHEMAVARYCDLPSKLGHS
mPlum     AEVKTTYMAKPP---VQLPGAYKTDIKLDITSHNEDYT-IVEQYERAEGRHSTGGMDELYK
mRouge    AEVKTTYKAKPP---VQLPGAYNTNYKLDITSHNEDYT-IVEQYERNEGRHSTGGMDELYK
RFP639    CSFETTYRSKKTDENFKMPGFFHVDHRLERLEESDKEM-FVVQHEHAVAKFCDLPSKLGRL
```

**(F) Large Stokes shift-like phenotype**

|                      |                 |                  |               |               |            |
|----------------------|-----------------|------------------|---------------|---------------|------------|
|                      | 10              | 20               | 30            | 40            | 50         |
| GFP                  | MSKGEELFTGVVPI  | LVELDGDVNGHKFS   | SVSGEGEGDATY  | GKLTTLKFICTTG | ---KLPVPWP |
| LSSmKate1            | MSELITENMHMKLY  | MEGTVNNHHFKCT    | SEGEKPYEGTQT  | MRKVV--EGG    | PLPFAFD    |
| LSSmKate2            | MSELITENMHMKLY  | MEGTVNNHHFKCT    | SEGEKPYEGTQT  | MRKVV--EGG    | PLPFAFD    |
| mKate/158G/160E      | MSELITENMHMKLY  | MEGTVNNHHFKCT    | SEGEKPYEGTQT  | MRKVV--EGG    | PLPFAFD    |
| mKate/143D/158V/160S | MSELIKENMHMKLY  | MEGTVNNHHFKCT    | SEGEKPYEGTQT  | MRKVV--EGG    | PLPFAFD    |
| mNeptune/158D        | MSELIKENMHMKLY  | MEGTVNNHHFKCT    | SEGEKPYEGTQT  | GRIKVV--EGG   | PLPFAFD    |
| mCherry/158E/160A    | SKGEEDNMAIIKEF  | MRFKVHMEGSVNG    | HEFEIEEGEGEGR | PYEGTQTAKL    | KVT--KGG   |
| mStrawberry/158D     | VSKGEENNMAIIKEF | MRFKVRMEGSVNG    | HEFEIEEGEGEGR | PYEGTQTAKL    | KVT--KGG   |
| mOrange/158D/160G    | SKGEENNMAIIKEF  | MRFKVRMEGSVNG    | HEFEIEEGEGEGR | PYEGFQTAKL    | KVT--KGG   |
| mKO/158E             | MVSVIKPEMKMRY   | YMDGSVNGHEFT     | IEEGEGTGRPYE  | GHQEMTLRV     | TMAKGGPMP  |
| mKeima               | MVSVIAKQMTYK    | VYMSGTVNGHYF     | EVEGDGKPKPYE  | GEQTVKLT      | TVT--KGG   |
|                      | 60              | 70               | 80            | 90            | 100        |
| GFP                  | TLVTTFSYGVQCF   | SRYPDHMKQHDF     | FKSAMPEGYVQ   | ERTIFFKDDG    | NYKTRA     |
| LSSmKate1            | ILATSFMYGSYTF   | INHTQGIP--DFF    | KQSFPEGFTW    | ERVTTYEDG     | GVLTATQ    |
| LSSmKate2            | ILATSFMYGSYTF   | INHTQGIP--DFF    | KQSFPEGFTW    | ERVTTYEDG     | GVLTATQ    |
| mKate/158G/160E      | ILATSFMYGSKTF   | INHTQGIP--DFF    | KQSFPEGFTW    | ERVTTYEDG     | GVLTATQ    |
| mKate/143D/158V/160S | ILATSFMYGSR     | TFINHTQGIP--DFF  | KQSFPEGFTW    | ERVTTYEDG     | GVLTATQ    |
| mNeptune/158D        | ILATCFMYGSK     | TFINHTQGIP--DFF  | KQSFPEGFTW    | ERVTTYEDG     | GVLTATQ    |
| mCherry/158E/160A    | ILSPQFMYGSK     | AYVKHPADIP--DYL  | KLSFPEGFKW    | ERVMNFEDG     | GVVTVTQ    |
| mStrawberry/158D     | ILTPNFYGSK      | AYVKHPADIP--DYL  | KLSFPEGFKW    | ERVMNFEDG     | GVVTVTQ    |
| mOrange/158D/160G    | ILSPQFTYGS      | KAYVKHPADIP--DYF | KLSFPEGFKW    | ERVMNFEDG     | GVVTVTQ    |
| mKO/158E             | LVSHVFCYGHR     | PFTKYPEEIP--DYF  | KQAFPEGLS     | WERSLEFED     | GGSASVSAH  |
| mKeima               | ILSPQLQYGS      | IPFTKYPEDIP--DYF | KQSFPEGYT     | WERSMNFED     | GAVCTVSND  |
|                      | 120             | 130              | 140           | 150           | 160        |
| GFP                  | LVNRIELKGI      | DFKEDGNILGH      | KLEYNYN       | SHNVYIMADK    | QKNGIKV    |
| LSSmKate1            | LIYNVKIRGV      | NFTSNGPVM-Q      | KKTLGWEAG     | TEMLYP--AD    | GGLEGRS    |
| LSSmKate2            | LIYNVKIRGV      | NFTSNGPVM-Q      | KKTLGWEAG     | TEMLYP--AD    | GGLEGRS    |
| mKate/158G/160E      | LIYNVKIRGV      | NFP              | SNPVM-QKKT    | LGWEASTE      | MLYP--AD   |
| mKate/143D/158V/160S | LIYNVKIRGV      | NFP              | SNPVM-QKKT    | LGWEADTE      | MLYP--AD   |
| mNeptune/158D        | LIYNVKIRGV      | NFP              | SNPVM-QKKT    | LGWEASTE      | TETLYP--AD |
| mCherry/158E/160A    | FIYKVKLRGT      | NFP              | PSDGPVM-Q     | KKTMGWEA      | SSEMYP--ED |
| mStrawberry/158D     | FIYKVKLRGT      | NFP              | PSDGPVM-Q     | KKTMGWEA      | SSEMYP--ED |
| mOrange/158D/160G    | FIYKVKLRGT      | NFP              | PSDGPVM-Q     | KKTMGWEA      | SSEMYP--ED |
| mKO/158E             | FYHKSFTG        | VNFPADGP         | IM-QNQSV      | DWEPSTEK      | ITA--SDG   |
| mKeima               | FIYNVKIS        | GENFPPNGP        | VIM-QKKT      | QGWEPSTE      | RLFA--RD   |
|                      | 180             | 190              | 200           | 210           | 220        |
| GFP                  | DHYQQNTPI       | GD-GPVLL         | PDNHYLSTQ     | SALS          | KDPNEKRD   |
| LSSmKate1            | NLKSTYRSK       | PKAKNLKVP        | GVYVDRRL      | LERIKEAD      | KET-YVE    |
| LSSmKate2            | NLKSTYRSK       | PKAKNLKVP        | GVYVDRRL      | LERIKEAD      | KET-YVE    |
| mKate/158G/160       | NLKTTYRSK       | PKAKNLKMP        | GVYVDRRL      | LERIKEAD      | KET-YVE    |
| mKate/143D/158V/160S | NLKTTYRSK       | PKAKNLKMP        | GVYVDRRL      | LERIKEAD      | KET-YVE    |
| mNeptune/158D        | NLKTTYRSK       | PKAKNLKMP        | GVYVDRRL      | LERIKEAD      | KET-YVE    |
| mCherry/158E/160A    | EVKTTYK         | AKKPV---QL       | P             | GAYVNIK       | L          |
| mStrawberry/158D     | EVKTTYK         | AKKPV---QL       | P             | GAYVNIK       | L          |
| mOrange/158D/160G    | EVKTTYK         | AKKPV---QL       | P             | GAYVNIK       | L          |
| mKO/158E             | QFKTTYK         | AAKKI--L         | KMPGSHYI      | SHRLVRK       | TEGN---    |
| mKeima               | EFKTTYK         | AKKPV---R        | MPGRHEI       | DRKLDVT       | SHNRD      |
|                      | 230             |                  |               |               |            |
|                      |                 |                  |               |               |            |

### (G) High quantum yield

10 20 30 40 50

GFP MSKGEELFTGVVPIILVELDGDVNGHFKFSVSGEGEGDATYGKLTLLKFICTTG--KLPVPWP  
rsTagRFP MVSKGEELIKENMHMKLYMEGTVNNHHFKCTSEGEGKPYEGTQTMRIKVV--EGGPLPFAFD  
KFP1 MASLLTETMPFKTTIEGTVNGHCFKCIKKGEGNPFEGTQEMKIEVI--EGGPLPFAFH  
asFP595\_70A/148S MASFLKKTMPFKTTIEGTVNGHYFKCTGKKGEGNPFEGTQEMKIEVI--EGGPLPFAFH  
HcRed1 MVSGLLKESMRIKMYMEGTVNGHYFKCEGEGDGNPFAGTQSMRIHVT--EGAPLPFAFD  
mCherry MVSKGEEDNMAIIKEFMRFKVHMEGTVNGHEFEIEGEGEGRPYEGTQAKLKVT--KGGPLPFAWD  
mKate2 MVSELIKENMHMKLYMEGTVNNHHFKCTSEGEGKPYEGTQTMRIKAV--EGGPLPFAFD  
mOrange MVSKGEENMAIIKEFMRFKVRMEGTVNGHEFEIEGEGEGRPYEGFQAKLKVT--KGGPLPFAWD  
TagRFP MVSKGEELIKENMHMKLYMEGTVNNHHFKCTSEGEGKPYEGTQTMRIKVV--EGGPLPFAFD

60 70 80 90 100 110

GFP TLVTTFSYGVQCFSTRYPDHMKQHDFFKSAMPEGYVQERTIFFKDDGNYKTRAEVKEFEGDT  
rsTagRFP ILATSFMYGSRTFINHTQGIP--DFWKQSFPEGFTWERVTTYEDGGVLTATQDTSLQDGC  
KFP1 ILSTSCMYGSKTFIKYVSGIP--DYFKQSFPEGFTWERTTTYEDGGFLTAHQDTSLDGDC  
asFP595\_70A/148S ILSTSCMYGSKAFIKYVSGIP--DYFKQSFPEGFTWERTTTYEDGGFLTAHQDTSLDGDC  
HcRed1 ILAPCCEYGSRTFVHHTAEIP--DFFKQSFPEGFTWERTTTYEDGGILTAAHQDTSLEGN  
mCherry ILSPQFMYGSKAYVKHPADIP--DYLKLSFPEGFKWERVMNFEDGGVLTATQDSSSLQDGE  
mKate2 ILATSFMYGSKTFINHTQGIP--DFFKQSFPEGFTWERVTTYEDGGVLTATQDTSLQDGC  
mOrange ILSPQFTYGSKAYVKHPADIP--DYFKLSFPEGFKWERVMNFEDGGVVTATQDSSSLQDGE  
TagRFP ILATSFMYGSRTFINHTQGIP--DFFKQSFPEGFTWERVTTYEDGGVLTATQDTSLQDGC

120 130 140 150 160 170

GFP LVNRIELKGIDFKEDGNILGHKLEYNNSHNVYIMADKQKNGIKVNFKIRHNIEDGSVQL  
rsTagRFP LIYNVKLRGVNFPNSNGPVM-QKKTLGWEAAATEMLYP--ADGGLEGRGDMALKLVGGGHLI  
KFP1 LVYKVKILGNNFPADGPVM-QNKVGRWEPGTEIVYE--VDGVLRGQSLMALKKCPGGRHLT  
asFP595\_70A/148S LVYKVKILGNNFPADGPVM-QNKAGRWEPESTEIVYE--VDGVLRGQSLMALKKCPGGRHLT  
HcRed1 LIYKVKVLGTNFPADGPVM-KNKSGGWEPESTEIVYE--ENGVLGRNVMALKV-GDRHLI  
mCherry FIYKVKLRGTNFPSDGPVM-QKKTMGWEASSERMYP--EDGALKGEIKQRLKLDGGHYD  
mKate2 LIYNVKIRGVNFPNSNGPVM-QKKTLGWEASTETLYP--ADGGLEGRADMALKLVGGGHLI  
mOrange FIYKVKLRGTNFPSDGPVM-QKKTMGWEASSERMYP--EDGALKGEIKMRLKLDGGHYT  
TagRFP LIYNVKIRGVNFPNSNGPVM-QKKTLGWEANTEMLYP--ADGGLEGRSDMALKLVGGGHLI

180 190 200 210 220 230

GFP ADHYQQNTPIGD-GPVLLPDNHYLSTQSALS KDPNEKRDMVLLLEFVTAAGITHGMDELYK  
rsTagRFP CNLKTTYRSKNPAKNLKMPGVYFVDHRLERIKEADKET-YVEQHEVAVARYCDLPSKLGHLN  
KFP1 CHLHTTYRSKPPASALKMPGFHFEDHRIEIMEEVEKKGK-CYKQYEA AVGRYCDAAAPSKLGHN  
asFP595\_70A/148S CHLHTTYRSKPPASALKMPGFHFEDHRIEIMEEVEKKGK-CYKQYEA AVGRYCDAAAPSKLGHN  
HcRed1 CHHYTSYRSKKA VRALTMPGFHFDTIRLQMLRKEKDE--YFELYEASVARYSDLPEKAN  
mCherry AEVKTTYKAKK---PVQLPGAYNVN IKLDITSHNEDYT-IVEQYERAEGRHSTGGMDELYK  
mKate2 CNLKTTYRSKPPAKNLKMPGVYVDRRLERIKEADKET-YVEQHEVAVARYCDLPSKLGHLN  
mOrange SEVKTTYKAKK---PVQLPGAYIVG IKLDITSHNEDYT-IVEQYERAEGRHSTGGMDELYK  
TagRFP CNFKTTYRSKPPAKNLKMPGVYVDRRLERIKE-ADKETYVEQHEVAVARYCDLPSKLGHLN



## (H) High photostability

10 20 30 40 50

GFP MSKGEELFTGVVPIILVELDGDVNGHKFSVSGEGEGDATYGKLT LKFICTTG---KLPVPWP  
TagRFP-T MVSKGEELIKENMHMKLYMEGTVNNHHFKCTSEGEGKPYEGTQTMRIKVV--EGGPLPFAFD  
mOrange2 MVSKGEENMAIIKEFMRFKVRMEGSVNGHEFEIEGEGEGRPYEGFQTAKLKVT--KGGPLPFAWD  
mKate2 MVSELIKENMHMKLYMEGTVNNHHFKCTSEGEGKPYEGTQTMRIKAV--EGGPLPFAFD

60 70 80 90 100 110

GFP TLVTTFSYGVQCFSTRYPDHMKQHDFFKSAMPEGYVQERTIFFKDDGNYKTRAEVKFEGDT  
TagRFP-T ILATSFMYGSRTFINHTQGIP--DFFKQSFPEGFTWERVTTYEDGGVLTATQDTS LQDGC  
mOrange2 ILSPHFTYGSKAYVKHPADIP--DYFKLSFPEGFKWERVMNYEDGGVVTVTQDSSLQDGE  
mKate2 ILATSFMYGSKTFINHTQGIP--DFFKQSFPEGFTWERVTTYEDGGVLTATQDTS LQDGC

120 130 140 150 160 170

GFP LVNRIELKGIDFKEDGNILGHKLEYNYNSHNVYIMADKQKNGIKVNFKIRHNIEDGSVQL  
TagRFP-T LIYNVKIRGVNFP SNGPVM-QKKT LGWEANTEMLYP--ADGGLEGRITDMALKLVGGGHLI  
mOrange2 FIYKVKLRGTNFP SNGPVM-QKKT MGWEASSERMYPE--DGALKGKI KMRLKLDGGHYT  
mKate2 LIYNVKIRGVNFP SNGPVM-QKKT LGWEASTETLYPA--DGGLEGRAD MALKLVGGGHLI

180 190 200 210 220 230

GFP ADHYQQNTPIGD-GPVLLPDNHYLSTQSALS KDPNEKRDHMLLEFVTAAGITHGMDELYK  
TagRFP-T CNFKTTYRSKPKAKNLKMPGVYVDRRLERIKEADKET-YVEQHEVAVARYCDLPSKLGHKLN  
mOrange2 SEVKTTYKAKK---PVQLPGAYIVDIKLDITSHNEDYT-IVEQYERAEGRHSTGGMDELYK  
mKate2 CNLKTTYRSKPKAKNLKMPGVYVDRRLERIKEADKET-YVEQHEVAVARYCDLPSKLGHKLN

## (I) High pH-stability

10 20 30 40 50

GFP MSKGEELFTGVVPI LVELDGDVNGHKFSVSGEGEGDATYGKLT LKFICTTG---KLPVPWP  
mTagBFP MSEELIKENMHMKLYMEGTVDNHHFKCTSEGEGKPYEGTQTMRIKVV--EGGPLPFAFD  
DsRed2 MASSENVITEFMRFKVRMEGTVNGHEFEIEGEGEGRPHYEGHNTVKKLKV---KGGPLPFAWD

60 70 80 90 100 110

GFP TLVTTFSYGVQCF SRYPDHMKQHDFFKSAMPEGYVQERTIFFKDDGNYKTRAEVKFEGDT  
mTagBFP ILATSFLYGSKTFINHTQGIP--DFFKQSFPEGFTWERVTTTYEDGGVLTATQDTS LQDGC  
DsRed2 ILSPQFQYGSKVYVKHPADIP--DYKKLSFPEGFKWERVMNFEDGGVATVTQDSSLQDGC

120 130 140 150 160 170

GFP LVNRIELKGIDFKEDGNILGHKLEYNYN SHNVYIMADKQKNGIKVNFKIRHNIEDGSVQL  
mTagBFP LIYNVKIRGVNFTSNGPVM-QKKT LGWEAFTETLYP--ADGGLEGRNDMALKLVGGSHLI  
DsRed2 FIYKVKFIGVNFPSDGPVM-QKKT MGWEASTERLYP--RDGVLKGETHKALKLKDGGHYL

180 190 200 210 220 230

GFP ADHYQQNTPIGD-GPVLLPDNHYLSTQSALS KDPNEKRDHMLLEFVTAAGITHGMDELYK  
mTagBFP ANIKTTYRSKKPAKNLKM PGVYYVDYRLERIKEANNET-YVEQHEVAVARYCDLPSKLGHKLN  
DsRed2 VEFKSIYMAKPP---VQLPGY YVDAKLDITSHNEDYT-IVEQYERTEGRHHLFL

(J) Fast maturation

```

          10      20      30      40      50
GFP      MSKGEELFTGVVPILVELDGDVNGHKFSVSGEGEGDATYGKLTTLKFICTTG---KLPVPWP
mKate2   MVSELIKENMHMKLYMEGTVNNHHFKCTSEGEGKPYEGTQTMRKAV--EGGPLPFAFD
mCherry  MVSKGEEDNMAIIKEFMRFKVHMEGSVNGHEFEIEGEGEGRPYEGTQTAKLKVT--KGGPLPFAWD
SlowFT   MVSKGEEDNMAIIKEFMRFKVHVEGSVNGHEFEIVGEGEGRPYEGTQTAKLKVT--KGGPLPFAWD
mRuby    MNSLIKENMRMKVVLSEGSVNGHQFKCTGEGEGNPYMGTTMRKVI--EGGPLPFAFD

          60      70      80      90      100     110
GFP      TLVTTFSYGVQCFSRYPDHMKQHDFFKSAMPEGYVQERTIFFKDDGNYKTRAEVKFEEDT
mKate2   ILATSFMYGSKTFINHTQGIP--DFFKQSFPEGFTWERVTTYEDGGVLTATQDTSLQDGC
mCherry  ILSPQFMYGSKAYVKHPADIP--DYLKLSFPEGFKWERVMNFEDGGVVTVTQDSSLQDGE
SlowFT   ILSPQFMYGSRAYVKHPADIP--DYWKLSFPEGFKWERVMNFEDGGVVTVTQDSSLQDGE
mRuby    ILATSFMYGSRTFIKYKPGIP--DFFKQSFPEGFTWERVTRYEDGGVITVMQDTSLEDGC

          120     130     140     150     160     170
GFP      LVNRIELKGIDFKEDGNILGHKLEYNYNshNVYIMADKQKNGIKVNFKIRHNIEDGSVQL
mKate2   LIYNVKIRGVNFPSNGPVM-QKKTLGWEASTETLYPA--DGGLEGRADMALKLVGGGHLI
mCherry  FIYKVKLRGTNFPDGPVM-QKKTMGWEASSERMYP--EDGALKGEIKQRLKLDGGHYD
Slow     FIYKVKLRGTNFPDGPVM-QKKTMGWEASSERMYP--EDGALKGEIKQRLKLDGGHYD
mRuby    LVYHAQVRGVNFPSNGAVM-QKKTGWEPNTEMYP--ADGGLRGYTHMALKVDGGGHLs

          180     190     200     210     220     230
GFP      ADHYQQNTPIGD-GPVLLPDNHYLSTQSALSKDPNEKRDHMLLEFVTAAGITHGMDELYK
mKate2   CNLKTTYRSKKPAKNLKMPGVYYVDRRLERIKEADKET-YVEQHEVAVARYCDLPSKLGKLN
mCherry  AEVKTTYKAKK---PVQLPGAYNVNIKLDITSHNEDYT-IVEQYERAEGRHSTGGMDELYK
SlowFT   VEVKTTYKAKK---PVQLPGAYNVNIKLDITSHNEDYT-IVEQYERAEGRHSTGGMDELYK
mRuby    CSFVTTYRSKKTVGNIKMPGIHAVDHRLELERLEESDNEM-FVVQREHAVAKFAGLGGGSLRSR
```

### (K) Monomeric state

```

          10      20      30      40      50
GFP      MSKGEELFTGVVPIILVELDGDVNGHKFSVSGEGEGDATYGKLTLLKFICTTG---KLPVWPW
PATagRFP MSELIKENMHMKLYMEGTVNNHHFKCTSEGEKPYEGTQTMRIKVV--EGGPLPFAFD
mNeptune MSELIKENMHMKLYMEGTVNNHHFKCTSEGEKPYEGTQTRIKVV--EGGPLPFAFD
mCherry  MVSKEEDNMAIIKEFMRFKVMHEGSVNGHEFEIEGEGEGRPYEGTQAKLKVT--KGGPLPFAWD
mRuby    MNSLIKENMRMKVVLEGSVNGHQFKCTGEGEGNPYMGQTQTMRIKVI--EGGPLPFAFD

          60      70      80      90      100     110
GFP      TLVTTFSYGVQCFSTRYPDHMKQHDFFKSAMPEGYVQERTIFFKDDGNYKTRAEVKFEEDT
PATagRFP ILATSFMYGSSTFINHTQGIP--DFWKQSFPEGFTWERVTTYEDGGVLTATQDTSLQDGC
mNeptune ILATCFMYGSKTFINHTQGIP--DFWKQSFPEGFTWERVTTYEDGGVLTATQDTSLQDGC
mCherry  ILSPQFMYGSKAYVKHPADIP--DYLKLSFPEGFKWERVMNFEDGGVVTVTQDSSLQDGE
mRuby    ILATSFMYGSRTFIKYKPGIP--DFWKQSFPEGFTWERVTRYEDGGVITVMQDTSLEDGC

          120     130     140     150     160     170
GFP      LVNRIELKGIIDFKEDGNILGHKLEYNYNSHNVYIMADKQKNGIKVNFKIRHNIEDGSVQL
PATagRFP LIYNVKIRGVNFPSNGPVM-KKKTLGWEPSTEKLP--ADGGLEGRVDMALKLVGGGHLI
mNeptune LIYNVKIRGVNFPSNGPVM-QKKTLGWEASTETLYP--ADGGLEGRCDMALKLVGGGHLI
mCherry  FIYKVKLRGTNFPSDGPVM-QKKTMGWEASSERMYP--EDGALKGEIKQRLKLDGGHYD
mRuby    LVYHAQVRGVNFPSNGAVM-QKKTGWEPNTEMMYP--ADGGLRGYTHMALKVDGGGHLI

          180     190     200     210     220     230
GFP      ADHYQQNTPIGD-GPVLDPDNHYLSTQSALS KDPNEKRDHMLLEFVTAAGITHGMDELYK
PATagRFP CNFKTTYRSKPKAKNLKMPGVYVDRRLEIIEADKET-YWEQHEVAVARYSDLPSKLGHKLN
mNeptune CNLKTTYRSKPKAKNLKMPGVYFVDRRLERIEADKET-YVEQHEVAVARYCDLPSKLGHKLN
mCherry  AEVKTTYKAKK---PVQLPGAYNVNIKLDITSHNEDYT-IVEQYERAEGRHSTGGMDELYK
mRuby    CSFVTTYRSKKTVGNIKMPGIHAVDHLRLERLEESDNEM-FVVQREHAVAKFAGLGGGSGLSR
```

**Supplementary Table 1.** Overview of suboptimal properties of current monomeric red fluorescent proteins.

| Phenotype of RFP   | Fluorescent protein | Form and its Excitation/Emission maxima, nm | Suboptimal properties                                                                                         | Ref. |
|--------------------|---------------------|---------------------------------------------|---------------------------------------------------------------------------------------------------------------|------|
| Fluorescent        | mKO                 | 548/559                                     | maturation, photoconversion to red species                                                                    | 1    |
|                    | mKO2                | 551/565                                     | photostability                                                                                                | 2    |
|                    | mOrange             | 548/562                                     | photostability, pH-stability, maturation, photoconversion to far-red species                                  | 3    |
|                    | mOrange2            | 549/565                                     | pH-stability, maturation, photoconversion to far-red species                                                  | 4    |
|                    | TagRFP              | 555/584                                     | maturation, photostability, monomeric state                                                                   | 5    |
|                    | TagRFP-T            | 555/584                                     | maturation, monomeric state                                                                                   | 4    |
|                    | mRuby               | 558/605                                     | maturation, photostability                                                                                    | 6    |
|                    | mStrawberry         | 574/596                                     | quantum yield, photostability                                                                                 | 3    |
|                    | mRaspberry          | 574/596                                     | maturation, quantum yield, photostability                                                                     | 7    |
|                    | mCherry             | 587/610                                     | quantum yield                                                                                                 | 3    |
|                    | mKate2              | 588/633                                     | pH-stability                                                                                                  | 8    |
|                    | mPlum               | 590/649                                     | maturation, brightness, photostability                                                                        | 7    |
|                    | eqFP650             | 592/650                                     | quantum yield, photostability                                                                                 | 9    |
|                    | mNeptune            | 600/650                                     | quantum yield, maturation, monomeric state, photostability                                                    | 10   |
| eqFP670            | 605/670             | quantum yield                               | 9                                                                                                             |      |
| Large Stokes shift | mKeima              | 440/620                                     | brightness, pH-stability, monomeric state, maturation, residual red fluorescence with yellow excitation light | 11   |
|                    | LSS-mKate1          | 463/624                                     | brightness, maturation                                                                                        | 12   |
|                    | LSS-mKate2          | 460/605                                     | brightness, maturation                                                                                        |      |
| Fluorescent Timers | FastFT              | Blue, 403/466                               | photostability                                                                                                | 13   |
|                    |                     | Red, 583/606                                | quantum yield                                                                                                 |      |
|                    | MediumFT            | Blue, 401/464                               | photostability                                                                                                |      |
|                    |                     | Red, 579/600                                | quantum yield                                                                                                 |      |
|                    | SlowFT              | Blue, 402/583                               | photostability                                                                                                |      |

|                                   |             |                |                                                                 |       |
|-----------------------------------|-------------|----------------|-----------------------------------------------------------------|-------|
|                                   |             | Red, 465/604   | quantum yield                                                   |       |
| <b>Photoactivatable</b>           | PAmCherry1  | Dark, 404/466  | N/A                                                             | 14    |
|                                   |             | Red, 564/594   | extinction coefficient, pH-stability                            |       |
|                                   | PATagRFP    | Dark, 351/none | N/A                                                             | 15    |
|                                   |             | Red, 562/595   | maturation                                                      |       |
| <b>Photoconvertible</b>           | mEos2       | Green, 506/519 | photostability, maturation, oligomeric state                    | 16    |
|                                   |             | Red, 573/584   | pH stability                                                    |       |
|                                   | mKikGR      | Green, 505/515 | photostability, pH-stability                                    | 17    |
|                                   |             | Red, 580/591   | photostability                                                  |       |
| <b>Reversibly photoswitchable</b> | KFP1        | Dark, 580/600  | N/A                                                             | 18    |
|                                   |             | Red, 580/600   | maturation, quantum yield                                       |       |
|                                   | rsTagRFP    | Dark, 440/none | extinction coefficient                                          | 19    |
|                                   |             | Red, 567/585   | brightness, pH stability, maturation, contrast                  |       |
|                                   | rsCherry    | Dark, 572/610  | contrast                                                        | 14,20 |
|                                   |             | Red, 572/610   | brightness, maturation, complex photobehavior during switching, |       |
|                                   | rsCherryRev | Dark, 572/608  | contrast                                                        |       |
|                                   |             | Red, 572/608   | brightness, maturation, photoactivation during switching,       |       |

N/A – not applicable.

**Supplementary Table 2.** Current red fluorescent proteins exhibiting the best specific property or maximally optimized for the specific imaging application.

| <b>RFP property</b>                                        | <b>Conventional RFPs</b>                                  | <b>Photoactivatable RFPs</b>                                           | <b>RFP application</b>                                        | <b>Conventional RFPs</b>    | <b>Photoactivatable RFPs</b> |
|------------------------------------------------------------|-----------------------------------------------------------|------------------------------------------------------------------------|---------------------------------------------------------------|-----------------------------|------------------------------|
| <i>Excitation beyond 610 nm</i>                            | TagRFP657 <sup>21</sup>                                   | not available                                                          | <i>STED</i>                                                   | TagRFP657                   | not applicable               |
| <i>Emission beyond 670 nm</i>                              | eqFP670 <sup>9</sup>                                      | not available                                                          | <i>Deep tissue imaging</i>                                    | mNeptune and E2-Crimson     | not available                |
| <i>One photon brightness</i>                               | mKOk <sup>22</sup> and tdTomato <sup>3</sup>              | mEos2 <sup>16</sup>                                                    | <i>RESOLFT</i>                                                | not applicable              | rsTagRFP                     |
| <i>Two-photon brightness</i>                               | DsRed2 and dTomato <sup>23</sup>                          | unknown                                                                | <i>PALM</i>                                                   | not applicable              | PATagRFP and tdEosFP         |
| <i>Photon counts per molecule</i>                          | Unknown                                                   | tdEosFP <sup>24</sup>                                                  | <i>Multicolor PALM</i>                                        | not applicable              | green PA-GFP                 |
| <i>pH stability</i>                                        | LSS-mKate2 <sup>12</sup> and TagRFP <sup>5</sup>          | PATagRFP <sup>15</sup> and KikGR <sup>25</sup>                         |                                                               |                             | red PATagRFP                 |
| <i>Maturation rate</i>                                     | mCherry <sup>3</sup> and mKate2 <sup>8</sup>              | rsTagRFP <sup>19</sup>                                                 | <i>Multicolor imaging with a single excitation wavelength</i> | blue TagBFP                 | not available                |
| <i>Intracellular half-life and thermodynamic stability</i> | mRFP1 <sup>26</sup>                                       | Dendra2 <sup>27</sup>                                                  |                                                               | green T-Sapphire            |                              |
| <i>Cytotoxicity</i>                                        | DsRed-Express2 <sup>28</sup> and E2-Crimson <sup>29</sup> | unknown                                                                |                                                               | red LSS-mKate2              |                              |
| <i>Monomeric state and performance in fusions</i>          | mCherry <sup>3</sup>                                      | PATagRFP <sup>15</sup> , Dendra2 <sup>30</sup> and mEos2 <sup>16</sup> | <i>FRET-based biosensors</i>                                  | Venus-mCherry <sup>31</sup> | EYFP-rsTagRFP <sup>19</sup>  |

**Supplementary Table 3.** Properties of the major chromophore structures observed in fluorescent proteins.

| Chemical structure of chromophore | Chromophore name                                                                                                                  | Number of double bonds in conjugation | Typical absorbance/emission max, nm | Examples of proteins sharing this chromophore                                                 |
|-----------------------------------|-----------------------------------------------------------------------------------------------------------------------------------|---------------------------------------|-------------------------------------|-----------------------------------------------------------------------------------------------|
| <i>1</i>                          | non-cyclized tripeptide X65-Tyr66-Gly67                                                                                           | none                                  | none                                | majority of FPs                                                                               |
| <i>3</i>                          | aromatic $\alpha$ -enolate                                                                                                        | 2                                     | 350-360/<br>undetectable            | PATagRFP (dark state)                                                                         |
| <i>4</i>                          | <b>TagBFP-like</b>                                                                                                                | 4                                     | 400-420/<br>456-466                 | TagBFP, FTs (blue state), PAmCherry (dark state), mCherry-Blue102                             |
| <i>5a, 6a, 8</i>                  | <b>DsRed-like</b><br><b>asFP595-like</b> ( <i>anionic</i> )                                                                       | 7, 8                                  | 555-610/<br>583-650                 | DsRed, mCherry, PAmCherry ( <i>trans</i> ), TagRFP ( <i>trans</i> ), mKate, PATagRFP, asFP595 |
| <i>5b, 6b</i>                     | <b>DsRed-like</b> ( <i>neutral</i> )                                                                                              | 8                                     | 440-463/535,<br>605-624             | mKeima, LSS-mKate1, LSS-mKate2, GmKate                                                        |
| <i>9, 10</i>                      | <b>mOrange-like, zFP538-like, mKO-like</b> ( <i>anionic</i> )                                                                     | 7                                     | 540-548/<br>561-565                 | mOrange, mKO, E2-Orange, zFP538                                                               |
| <i>7</i>                          | <b>DsRed-like</b><br><b>a) H-bonding</b><br><b>b) hydrophobic packing</b><br><b>c) <math>\pi</math>-<math>\pi</math> stacking</b> | 8                                     | >610/<br>>650                       | TagRFP657, E2-Crimson, mNeptune, mRouge                                                       |
| <i>11</i>                         | <b>PSmOrange-like</b>                                                                                                             | 8                                     | >610/<br>>650                       | PSmOrange                                                                                     |
| <i>12</i>                         | <b>GFP-like</b> ( <i>anionic</i> )                                                                                                | 6                                     | 484-493/<br>502-510                 | EGFP, TagGFP2, Emerald                                                                        |
| <i>13</i>                         | <b>GFP-like</b> ( <i>neutral</i> )                                                                                                | 6                                     | 399/<br>511                         | wtGFP, Sapphire, Ametrine                                                                     |
| <i>14</i>                         | <b>Kaede-like</b>                                                                                                                 | 9                                     | 550-580/<br>580-595                 | Kaede, mEos2, mKikGR, Dendra, mIrisFP                                                         |

See Figure 2 for chemical structures of the chromophores. Additional characteristics of the listed proteins are summarized in the review papers<sup>32-34</sup>.



**Supplementary Table 4.** Amino acid residues in the supporting positions of red fluorescent proteins.

| Phenotype/property<br>(structure/transition) |                                      | Supporting positions |                    |              |                    |                    |                    |              |              |              |                | Ref.       |                |               |
|----------------------------------------------|--------------------------------------|----------------------|--------------------|--------------|--------------------|--------------------|--------------------|--------------|--------------|--------------|----------------|------------|----------------|---------------|
| TagBFP-like (4)                              |                                      | 65<br>H,L            | 69<br>K,R          | 165<br>A,I,N | 179<br>A           | 181<br>A,I         |                    |              |              |              |                |            | 13,35          |               |
| Fluorescent timer-like<br>(4→5a,6a)          |                                      | 18<br>V,L,M          |                    | 106<br>A     | 152<br>M,I         | 179<br>V,A         | 203<br>S,I         | 205<br>M,L   | 224<br>S,A   |              |                |            | 13,36          |               |
| Photoactivatable-like<br>(4→5a,6a)           |                                      | 18<br>L,M            | 58<br>T,A          | 84<br>F,W    | 148<br>L,S,N,H,T,F | 165<br>V,L,S,A,G,Q | 167<br>P,A,M,G     | 169<br>V,T,L | 179<br>T,A,C | 207<br>I,R   | 218<br>W,V     |            | 14,15,37,38    |               |
| Photoswitchable-like<br>(5a↔6a)              |                                      | 146<br>V,E           | 150<br>E           | 181<br>F,L,S | 183<br>T           |                    |                    |              |              |              |                |            | 19,20,39,40    |               |
| Far-red-shifted-<br>like                     | H-bonding to N-acylimine oxygen (7a) | 63<br>C,F            | 64<br>I,F          | 165<br>C     |                    |                    |                    |              |              |              |                |            | 9,10,21,41-45  |               |
|                                              | Hydrophobic packing (7c)             | 181<br>F,L,V         |                    | 201<br>T,V   |                    | 224<br>C,N,A       |                    |              |              |              |                |            |                |               |
|                                              | π-stacking (7b)                      | 181<br>F,L,V         |                    | 201<br>A,T   | 224<br>C,N,A       |                    |                    |              |              |              |                |            |                |               |
| Large Stokes shift-like<br>(5b,6b)           |                                      | 69<br>R,K,Y          |                    | 148<br>G,S,N | 165<br>G,A,V,N     |                    | 167<br>S,M,A,G,L,N |              | 183<br>T,S   |              |                |            | 11,12,46-48    |               |
| High quantum yield                           |                                      | 145<br>W             | 146<br>E           | 147<br>P,A   | 203<br>H,I,R       |                    |                    |              |              |              |                |            | 3,5,8,41,49-52 |               |
| High photostability                          |                                      | 145<br>W             | 146<br>E           | 147<br>P,A   | 163<br>K           |                    |                    |              |              |              |                |            | 4,8,52         |               |
| High pH-stability                            |                                      | 145<br>W             | 146<br>E           | 147<br>P,A   |                    |                    |                    |              |              |              |                |            | 52-54          |               |
| Fast maturation                              |                                      | 18<br>V,L,M          | 21<br>T,S          | 44<br>M,A    | 48<br>A,V          | 106<br>I,V,<br>L   | 152<br>M,I,L       | 165<br>A,I,T | 167<br>M,Q   | 181<br>L,V,F | 203<br>S,I,R,H | 205<br>M,L | 238<br>R       | 8,13,45,55-57 |
| Monomeric state                              |                                      | 128<br>V,T           | 151<br>K,T,R,<br>M | 153<br>K,Y   | 157<br>A,E         |                    | 178<br>I,D,S       | 180<br>N,E,S | 184<br>T     | 198<br>V,A,I | 200<br>Y,F,N,A |            | 229<br>S,C,A   | 6,10,15,56-58 |

The supporting residues correspond to those on Figure S1 highlighted with yellow color. Residues' numbering follows that for GFP.

## Supplementary Note

### Major steps of molecular evolution

A typical process of the development of fluorescent proteins with required spectral and biochemical properties includes a rational design and several steps of directed molecular evolution (**Fig. 1**). The starting points are design of new spectral phenotype of fluorescent protein based on the known mechanisms of chromophore transformations and choosing of an appropriate template gene.

Next step involves the rational design based on the knowledge of relationship between immediate chromophore environment and postranslational chemistry of fluorescent proteins and photochemical properties of the chromophore. At this step, the selected templates are subjected to multiple site-specific amino acid substitutions at the key and supporting positions, in order to generate a library of site-specific mutants. After screening this library typically in a low-throughput format, several primary clones, possessing the required spectral phenotype, are selected.

Several rounds of directed molecular evolution are then applied to improve the properties of imperfect primary variants. Major challenges to get a successful directed evolution include selecting an optimal biological system for expression, obtaining a sufficient number of clones in a library, and achieving reliable screening conditions. Each round of the directed molecular evolution begins with a generation of a large mutant library, using various strategies of mutagenesis and recombination<sup>59-62</sup>. A high-throughput screening (HTS) of the library and subsequent evaluation of the selected clones in a low-throughput format then follows. The clones exhibiting prominent characteristics of the required phenotype are then applied to the next round of molecular evolution. After several rounds, the screened properties usually reach a plateau, suggesting that either a natural limit is achieved or some bias, caused by the mutagenesis strategy used, is the culprit. To avoid the latter case, a saturated multi-site mutagenesis is typically applied to the selected mutants at amino acid positions found during the rounds of molecular evolution. Finally, testing of advanced variants with optimized characteristics by creating fusion proteins and their imaging in live cells comes before wide usage in the life sciences.

### Historical aspects of the molecular evolution strategy in the development of fluorescent proteins

In the past, fluorescent proteins of new colors such as mFruits have been mainly developed using random mutagenesis on the basis of wild-type protein templates of required weak phenotype<sup>3</sup>. Over time the more structure-to-function information has become available for fluorescent proteins and it resulted into appearance of rational component in the creation of fluorescent proteins. The PAmCherrys<sup>14</sup>, PATagRFP<sup>15</sup>, rsCherrys<sup>20</sup>, rsTagRFP<sup>19</sup>, KikGR<sup>25</sup>, mRouge<sup>41</sup> and series of TagBFP-<sup>35</sup> and LSS-like<sup>46</sup> fluorescent proteins have different colors and photochemical behavior and all of them were developed using rational mutagenesis at amino acids around chromophore to find weak phenotype followed by random mutagenesis for the further improvement of mainly brightness, maturation and photostability.

### Correlation between residues at key positions and fluorescent protein phenotype

The residues at key positions 84, 148 and 203 for TagBFP-like phenotype mainly sterically hinder Tyr-ring of the chromophore occupies position necessary for the oxidation of

C $\alpha$ 2-C $\beta$ 2 double bond between Tyr-ring and imidazolinone and improve brightness of blue chromophore 4.

The residues at key positions 69 and 84 for FT-like phenotype slow down 4-to-5a,6a transition and increase brightness of blue chromophore 4. The residues at crucial positions 69 and 203 for photoactivatable-like phenotype block 4-to-5a,6a transition. The residues at main positions 148, 165, 167 and 203 for photoswitchable-like phenotype provide space around Tyr-ring of the chromophore and ensure flexibility of the chromophore for *cis-trans* isomerization of the chromophore to occur.

The far-red shift in RFPs can be attributed by the formation of hydrogen bond between residues at positions 14, 16 and 44 and N-acylimine oxygen, by hydrophobic parking around chromophore provided by hydrophobic residues at positions 84, 148, 165 and 167 and by stacking interactions between aromatic residue at positions 65, 69, 148 and 203 and Tyr-ring of the chromophore.

Large Stokes shift-like phenotype relies on the Glu and Asp acidic amino acids at positions 148, 165 and 167 which stabilize neutral chromophore 5b,6b and support proton transfer in excited state.

High photostability of RFPs mainly depends on amino acids at positions 64, 99 and 165 which provide tight packing around chromophore and block photochemical reactions.

Fast maturation of RFPs is primarily affected by residues at positions 42, 69, 179, and 224 which facilitate 2-to-5a,6a transition.

The A-B and A-C dimerizing interfaces in RFPs are mainly disrupted by charged amino acid residues at positions 126, 162, 166 and 168.

High quantum yield in RFPs depends on the residues at positions 70, 148 and 167 which provide planar configuration and rigidity of the chromophore.

High pH-stability of blue and red chromophores 4 and 5a,6a, respectively, is provided by the residues at positions 96 and 167 which stabilize negative charge on CO-group of imidazolinone and Tyr-ring, respectively.

Maturation rate, pH-stability, quantum yield and photostability may be affected by the width of the water-filled pore which regulated by the residues at positions 145-147.

There are many examples in the world of fluorescent proteins where a particular feature (e.g., a red color in DsRed) is a synergistic effect of a large number of residue substitutions, including many residues that are remote from the active site. How these positions control fluorescence via coupling to each other is poorly understood. This is why the directed evolution approach will be useful for final turning of the residues remote from chromophore with found spectral phenotype.

## Supplementary references

1. Karasawa, S., Araki, T., Nagai, T., Mizuno, H. & Miyawaki, A. Cyan-emitting and orange-emitting fluorescent proteins as a donor/acceptor pair for fluorescence resonance energy transfer. *Biochem. J.* **381**, 307-312 (2004).
2. Sakaue-Sawano, A. et al. Visualizing spatiotemporal dynamics of multicellular cell-cycle progression. *Cell* **132**, 487-498 (2008).
3. Shaner, N.C. et al. Improved monomeric red, orange and yellow fluorescent proteins derived from *Discosoma* sp. red fluorescent protein. *Nat. Biotechnol.* **22**, 1567-1572 (2004).
4. Shaner, N.C. et al. Improving the photostability of bright monomeric orange and red fluorescent proteins. *Nat. Methods* **5**, 545-551 (2008).
5. Merzlyak, E.M. et al. Bright monomeric red fluorescent protein with an extended fluorescence lifetime. *Nat. Methods* **4**, 555-557 (2007).
6. Kredel, S. et al. mRuby, a bright monomeric red fluorescent protein for labeling of subcellular structures. *PLoS One* **4**, e4391 (2009).
7. Wang, L., Jackson, W.C., Steinbach, P.A. & Tsien, R.Y. Evolution of new nonantibody proteins via iterative somatic hypermutation. *Proc. Natl. Acad. Sci. USA* **101**, 16745-16749 (2004).
8. Shcherbo, D. et al. Far-red fluorescent tags for protein imaging in living tissues. *Biochem. J.* **418**, 567-574 (2009).
9. Shcherbo, D. et al. Near-infrared fluorescent proteins. *Nat. Methods* **7**, 827-829 (2010).
10. Lin, M.Z. et al. Autofluorescent proteins with excitation in the optical window for intravital imaging in mammals. *Chem. Biol.* **16**, 1169-1179 (2009).
11. Kogure, T. et al. A fluorescent variant of a protein from the stony coral *Montipora* facilitates dual-color single-laser fluorescence cross-correlation spectroscopy. *Nat. Biotechnol.* **24**, 577-581 (2006).
12. Piatkevich, K.D. et al. Monomeric red fluorescent proteins with a large Stokes shift. *Proc. Natl. Acad. Sci. USA* **107**, 5369-5374 (2010).
13. Subach, F.V. et al. Monomeric fluorescent timers that change color from blue to red report on cellular trafficking. *Nat. Chem. Biol.* **5**, 118-126 (2009).
14. Subach, F.V. et al. Photoactivatable mCherry for high-resolution two-color fluorescence microscopy. *Nat. Methods* **6**, 153-159 (2009).
15. Subach, F.V., Patterson, G.H., Renz, M., Lippincott-Schwartz, J. & Verkhusha, V.V. Bright monomeric photoactivatable red fluorescent protein for two-color super-resolution sptPALM of live cells. *J. Am. Chem. Soc.* **132**, 6481-6491 (2010).
16. McKinney, S.A., Murphy, C.S., Hazelwood, K.L., Davidson, M.W. & Looger, L.L. A bright and photostable photoconvertible fluorescent protein. *Nat. Methods* **6**, 131-133 (2009).
17. Habuchi, S., Tsutsui, H., Kochaniak, A.B., Miyawaki, A. & van Oijen, A.M. mKikGR, a monomeric photoswitchable fluorescent protein. *PLoS One* **3**, e3944 (2008).
18. Chudakov, D.M. et al. Kindling fluorescent proteins for precise in vivo photolabeling. *Nat. Biotechnol.* **21**, 191-194 (2003).
19. Subach, F.V. et al. Red fluorescent protein with reversibly photoswitchable absorbance for photochromic FRET. *Chem. Biol.* **17**, 745-755 (2010).

20. Stiel, A.C. et al. Generation of monomeric reversibly switchable red fluorescent proteins for far-field fluorescence nanoscopy. *Biophys. J.* **95**, 2989-2997 (2008).
21. Morozova, K.S. et al. Far-red fluorescent protein excitable with red lasers for flow cytometry and superresolution STED nanoscopy. *Biophys. J.* **99**, L13-15 (2010).
22. Tsutsui, H., Karasawa, S., Okamura, Y. & Miyawaki, A. Improving membrane voltage measurements using FRET with new fluorescent proteins. *Nat. Methods* **5**, 683-685 (2008).
23. Drobizhev, M., Tillo, S., Makarov, N.S., Hughes, T.E. & Rebane, A. Absolute two-photon absorption spectra and two-photon brightness of orange and red fluorescent proteins. *J. Phys. Chem. B* **113**, 855-859 (2009).
24. Nienhaus, K., Nienhaus, G.U., Wiedenmann, J. & Nar, H. Structural basis for photo-induced protein cleavage and green-to-red conversion of fluorescent protein EosFP. *Proc Natl Acad Sci USA* **102**, 9156-9159 (2005).
25. Tsutsui, H., Karasawa, S., Shimizu, H., Nukina, N. & Miyawaki, A. Semi-rational engineering of a coral fluorescent protein into an efficient highlighter. *EMBO Rep.* **6**, 233-238 (2005).
26. Stepanenko, O.V. et al. Comparative studies on the structure and stability of fluorescent proteins EGFP, zFP506, mRFP1, "dimer2", and DsRed1. *Biochemistry* **43**, 14913-14923 (2004).
27. Kedrin, D. et al. Intravital imaging of metastatic behavior through a mammary imaging window. *Nat. Methods* **5**, 1019-10121 (2008).
28. Strack, R.L. et al. A noncytotoxic DsRed variant for whole-cell labeling. *Nat. Methods* **5**, 955-957 (2008).
29. Strack, R.L. et al. A Rapidly Maturing Far-Red Derivative of DsRed-Expres2 for Whole-Cell Labeling. *Biochemistry* **48**, 8279-8281 (2009).
30. Baker, S.M., Buckheit, R.W., 3rd & Falk, M.M. Green-to-red photoconvertible fluorescent proteins: tracking cell and protein dynamics on standard wide-field mercury arc-based microscopes. *BMC Cell Biol.* **11**, 15 (2010).
31. Hazelwood, K.L. et al. Searching the fluorescent protein color palette for new FRET pairs. *Proc. SPIE* **6868**, 68681-686812 (2008).
32. Davidson, M.W. & Campbell, R.E. Engineered fluorescent proteins: innovations and applications. *Nat. Methods* **6**, 713-717 (2009).
33. Chudakov, D.M., Matz, M.V., Lukyanov, S. & Lukyanov, K.A. Fluorescent proteins and their applications in imaging living cells and tissues. *Physiol. Rev.* **90**, 1103-1163 (2010).
34. Piatkevich, K.D., Efremenko, E.N., Verkhusha, V.V. & Varfolomeev, S.D. Red fluorescent proteins and their properties. *Russ. Chem. Rev.* **79**, 243-258 (2010).
35. Subach, O.M. et al. Conversion of red fluorescent protein into a bright blue probe. *Chem. Biol.* **15**, 1116-1124 (2008).
36. Terskikh, A. et al. "Fluorescent timer": protein that changes color with time. *Science* **290**, 1585-1588 (2000).
37. Subach, F.V. et al. Photoactivation mechanism of PAmCherry based on crystal structures of the protein in the dark and fluorescent states. *Proc. Natl. Acad. Sci. USA* **106**, 21097-21102 (2009).
38. Gunewardene, M.S. et al. Superresolution Imaging of Multiple Fluorescent Proteins with Highly Overlapping Emission Spectra in Living Cells. *Biophys. J.* **101**, doi:10.1016/j.bpj.2011.1007.1049 (2011).

39. Chudakov, D.M., Feofanov, A.V., Mudrik, N.N., Lukyanov, S. & Lukyanov, K.A. Chromophore environment provides clue to "kindling fluorescent protein" riddle. *J. Biol. Chem.* **278**, 7215-7219 (2003).
40. Wiedenmann, J. et al. From EosFP to mIrisFP: structure-based development of advanced photoactivatable marker proteins of the GFP-family. *J. Biophotonics* **4**, 377-390 (2011).
41. Chica, R.A., Moore, M.M., Allen, B.D. & Mayo, S.L. Generation of longer emission wavelength red fluorescent proteins using computationally designed libraries. *Proc. Natl. Acad. Sci. USA* **107**, 20257-20262 (2010).
42. Shu, X., Shaner, N.C., Yarbrough, C.A., Tsien, R.Y. & Remington, S.J. Novel chromophores and buried charges control color in mFruits. *Biochemistry* **45**, 9639-9647 (2006).
43. Shu, X., Wang, L., Colip, L., Kallio, K. & Remington, S.J. Unique interactions between the chromophore and glutamate 16 lead to far-red emission in a red fluorescent protein. *Protein Sci.* **18**, 460-466 (2009).
44. Strack, R.L. et al. A rapidly maturing far-red derivative of DsRed-Express2 for whole-cell labeling. *Biochemistry* **48**, 8279-8281 (2009).
45. Kredel, S. et al. Optimized and far-red-emitting variants of fluorescent protein eqFP611. *Chem. Biol.* **15**, 224-233 (2008).
46. Piatkevich, K.D., Malashkevich, V.N., Almo, S.C. & Verkhusha, V.V. Engineering ESPT pathways based on structural analysis of LSSmKate red fluorescent proteins with large Stokes shift. *J. Am. Chem. Soc.* **132**, 10762-10770 (2010).
47. Henderson, J.N. et al. Excited state proton transfer in the red fluorescent protein mKeima. *J. Am. Chem. Soc.* **131**, 13212-13213 (2009).
48. Kogure, T., Kawano, H., Abe, Y. & Miyawaki, A. Fluorescence imaging using a fluorescent protein with a large Stokes shift. *Methods* **45**, 223-226 (2008).
49. Lukyanov, K.A. et al. Natural animal coloration can be determined by a nonfluorescent green fluorescent protein homolog. *J. Biol. Chem.* **275**, 25879-25882 (2000).
50. Pletnev, S., Subach, F.V., Dauter, Z., Wlodawer, A. & Verkhusha, V.V. Structural basis for reversible photoswitching of absorbance spectra in red fluorescent protein rsTagRFP. *Submitted*.
51. Gurskaya, N.G. et al. GFP-like chromoproteins as a source of far-red fluorescent proteins. *FEBS Lett.* **507**, 16-20 (2001).
52. Stiel, A.C. et al. 1.8 Å bright-state structure of the reversibly switchable fluorescent protein Dronpa guides the generation of fast switching variants. *Biochem. J.* **402**, 35-42 (2007).
53. Wilmann, P.G. et al. The 2.1 Å crystal structure of copGFP, a representative member of the copepod clade within the green fluorescent protein superfamily. *J. Mol. Biol.* **359**, 890-900 (2006).
54. Bravaya, K.B., Korovina, N., Subach, O.M., Verkhusha, V.V. & Krylov, A.I. Puzzling over the mechanism of red chromophore maturation in the DsRed-like proteins: The nature of the blue intermediate revealed. *Submitted*.
55. Pletnev, S., Subach, F.V., Dauter, Z., Wlodawer, A. & Verkhusha, V.V. Understanding blue-to-red conversion in monomeric fluorescent timers and hydrolytic degradation of their chromophores. *J. Am. Chem. Soc.* **132**, 2243-2253 (2010).
56. Campbell, R.E. et al. A monomeric red fluorescent protein. *Proc. Natl. Acad. Sci. USA* **99**, 7877-7882 (2002).

57. Wiedenmann, J. et al. A far-red fluorescent protein with fast maturation and reduced oligomerization tendency from *Entacmaea quadricolor* (Anthozoa, Actinaria). *Proc. Natl. Acad. Sci. USA* **99**, 11646-11651 (2002).
58. Nienhaus, K., Nar, H., Heilker, R., Wiedenmann, J. & Nienhaus, G.U. Trans-cis isomerization is responsible for the red-shifted fluorescence in variants of the red fluorescent protein eqFP611. *J. Am. Chem. Soc.* **130**, 12578-12579 (2008).
59. Wang, T.W. et al. Mutant library construction in directed molecular evolution: casting a wider net. *Mol. Biotechnol.* **34**, 55-68 (2006).
60. Farinas, E.T., Bulter, T. & Arnold, F.H. Directed enzyme evolution. *Curr. Opin. Biotechnol.* **12**, 545-551 (2001).
61. Yuan, L., Kurek, I., English, J. & Keenan, R. Laboratory-directed protein evolution. *Microbiol. Mol. Biol. Rev.* **69**, 373-392 (2005).
62. Giver, L. & Arnold, F.H. Combinatorial protein design by in vitro recombination. *Curr. Opin. Chem. Biol.* **2**, 335-338 (1998).
